# Supplementary material
Source: PubMed Central journal article supplement (PMC5448093)
Supplement: 10.1074_M116.767889_jbc.M116.767889-1.pdf [file 10.1074_M116.767889_jbc.M116.767889-1.pdf]

Fig. S1

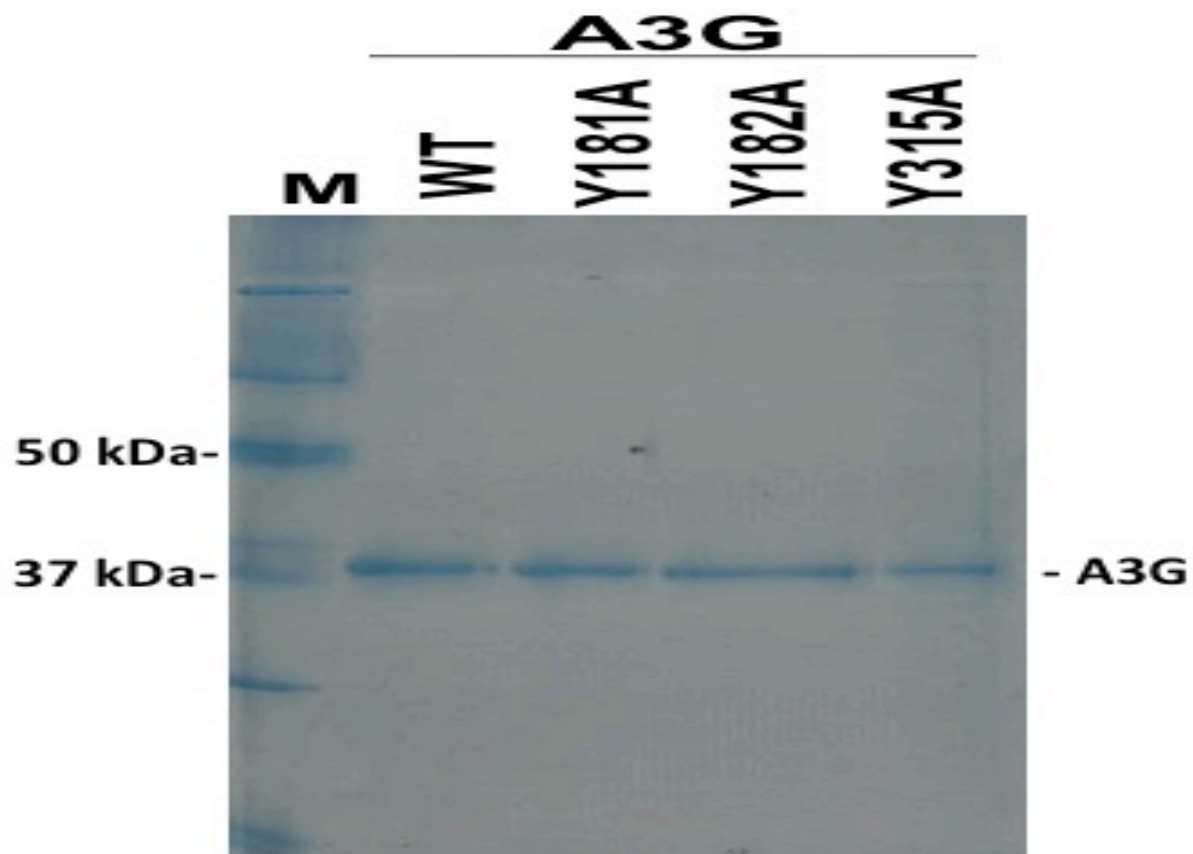

Fig. S2

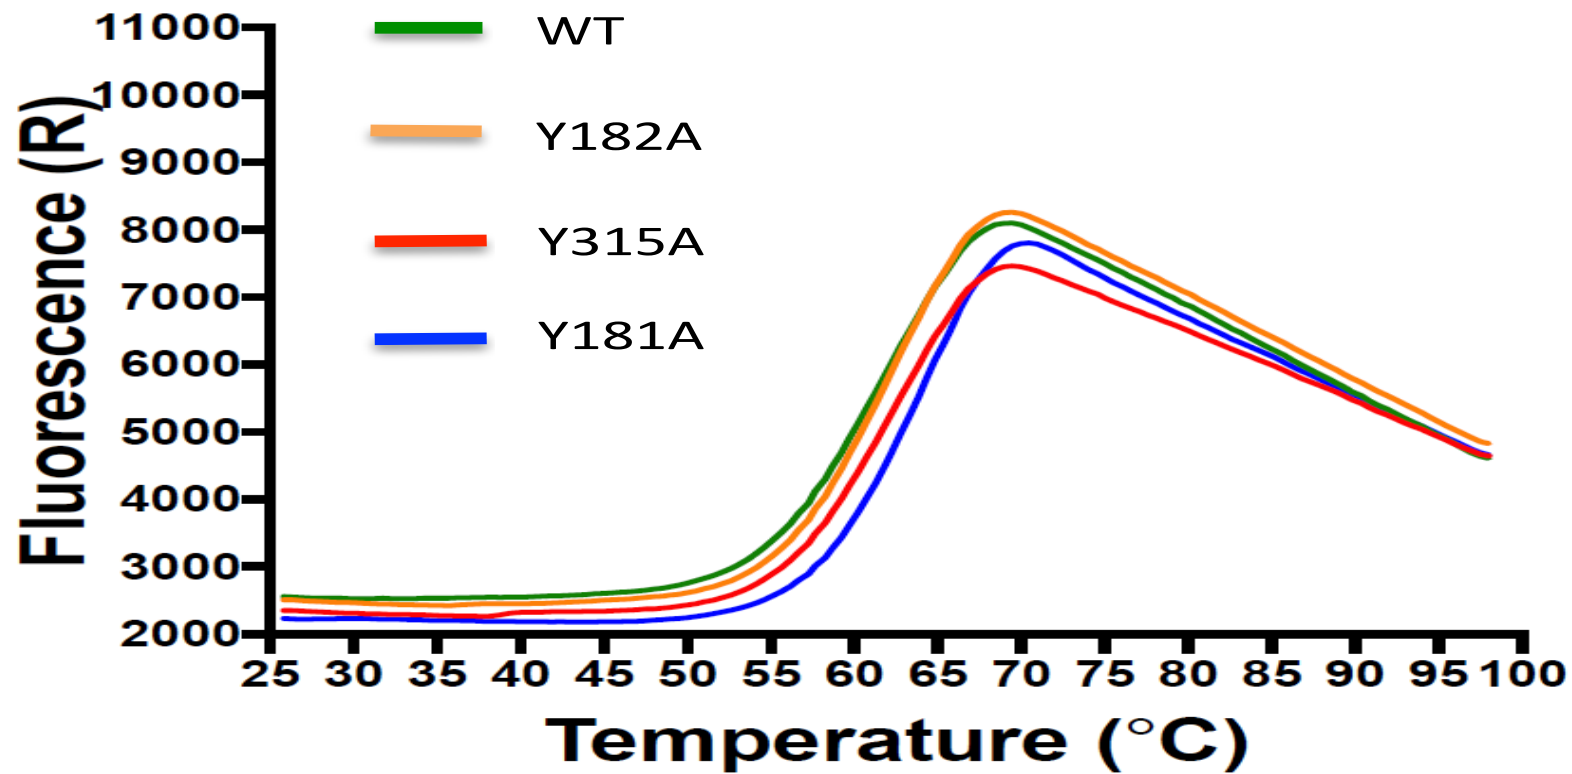

Fig. S3

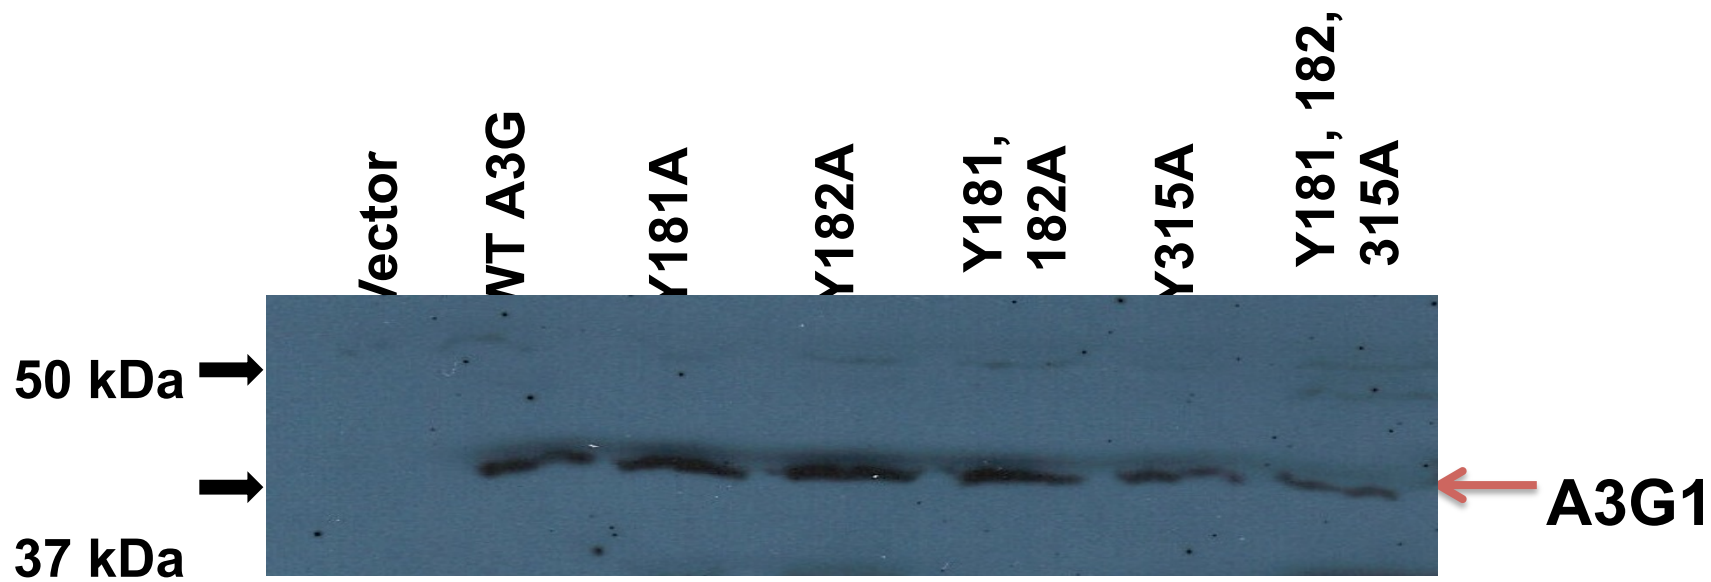

Fig. S4

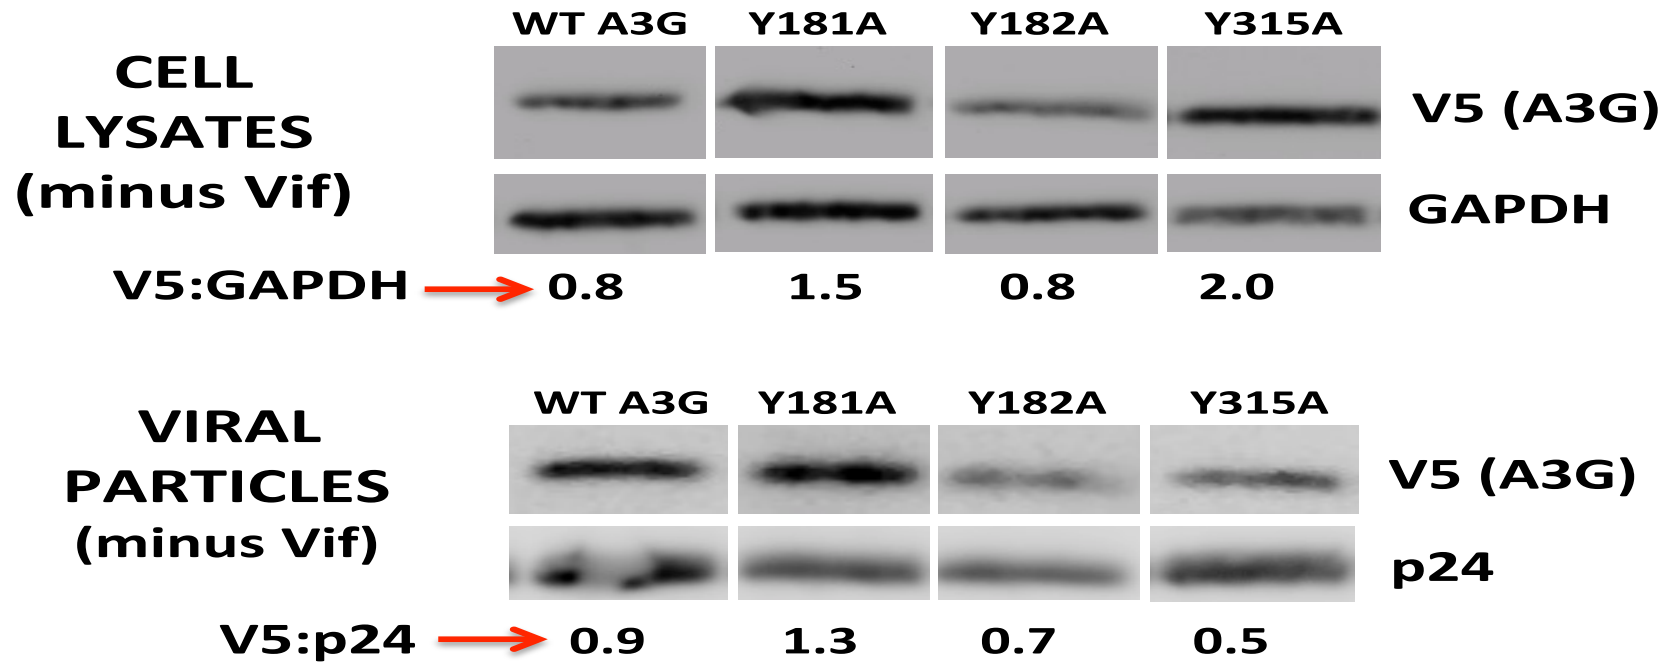

**Table S1.** Mass to Charge Ratios for A3G Tryptic Peptide aa 181-194, Sequence YYILLHIMGEILR, Identified by MS in Cross-linked Sample with ssDNA Containing BrdU (Fragmentation Ions for the Same Peptide that is Presented in Fig. 1, top panel).

|                 | Tyr      | Tyr      | Ile      | Leu      | Leu      | His      | Ile      | Met      | Gly      | Glu      | Ile      | Leu      | Arg      |
|-----------------|----------|----------|----------|----------|----------|----------|----------|----------|----------|----------|----------|----------|----------|
| Ion             | 1        | 2        | 3        | 4        | 5        | 6        | 7        | 8        | 9        | 10       | 11       | 12       | 13       |
| a               | 520.012* | 683.075* | 796.159* | 909.243  | 1022.32* | 1159.38* | 1272.47* | 1419.505 | 1476.527 | 1605.569 | 1718.654 | 1831.738 | 1987.839 |
| a <sup>2+</sup> | 250.66** | 342.04*  | 398.58*  | 455.12** | 511.663* | 580.193* | 636.735* | 702.22** | 730.76** | 795.28** | 851.82** | 908.37** | 986.42** |
| b               | 548.006* | 711.07*  | 824.154* | 937.238* | 1050.32* | 1187.38* | 1300.46* | 1447.5   | 1504.522 | 1633.564 | 1746.648 | 1859.732 | 2015.834 |
| b <sup>2+</sup> | 274.503* | 356.035* | 402.57** | 469.119* | 525.661* | 594.190* | 650.73** | 716.25** | 744.76** | 809.28** | 865.82** | 922.33** | 1000.41  |
| y               | 175.119  | 288.203  | 401.287* | 530.33*  | 587.351* | 734.387* | 847.471* | 984.53*  | 1097.614 | 1210.698 | 1323.782 | 1486.845 | 2033.844 |
|                 | Arg      | Leu      | Ile      | Glu      | Gly      | Met      | Ile      | His      | Leu      | Leu      | Ile      | Tyr      | Tyr      |

**Footnote:** Possible 1+ (a, b, y) and 2+ (a<sup>2+</sup>, b<sup>2+</sup>) values for mass to charge fragments of the A3G tryptic peptide  $m/z = 678.977^{3+}$ , aa 181-194, sequence YYILLHIMGEILR, produced after cross-linking/modification of BrdU to Y181. An asterisk (\*) indicates MS/MS identified fragments containing BrdU cross-linked nucleotide, a double asterisk (\*\*) indicates the identified MS/MS cross-linked fragments that lost hydroxyl group or water molecule. This peptide was also modified by methionine oxidation.

**Table S2.** Mass to Charge Ratios for A3G Tryptic Peptide aa 314-320, Sequence IYDDQGR, Identified by MS in Cross-linked Sample with ssDNA containing BrdU (Fragmentation Ions for the Same Peptide that is Presented in Fig. 1, Bottom Panel).

|                 | Ile     | Tyr       | Asp       | Asp      | Gln       | Gly      | Arg      |
|-----------------|---------|-----------|-----------|----------|-----------|----------|----------|
| Ion             | 1       | 2         | 3         | 4        | 5         | 6        | 7        |
| a               | 86.096  | 633.096*  | 748.123*  | 863.149* | 991.208** | 1048.23* | 1204.331 |
| a <sup>2+</sup> | 43.547  | 317.048** | 374.562** | 432.075* | 496.104*  | 524.615* | 602.666* |
| b               | 114.091 | 661.09*   | 776.117*  | 891.14** | 1019.203  | 1076.22* | 1232.326 |
| b <sup>2+</sup> | 57.546  | 331.045*  | 388.559** | 446.072* | 510.102*  | 538.61** | 616.663* |
| y               | 175.119 | 232.14    | 360.199   | 475.226* | 590.253*  | 1137.25* | 1250.336 |
|                 | Arg     | Gly       | Gln       | Asp      | Asp       | Tyr      | Ile      |

**Footnote:** Possible 1+ (a, b, y) and 2+ (a<sup>2+</sup>, b<sup>2+</sup>) values for mass to charge fragments of the A3G tryptic peptide  $m/z = 625.3162^{2+}$ , aa 314-320, sequence IYDDQGR, produced after cross-linking/modification of BrdU to Y315. An asterisk (\*) indicates MS/MS identified fragments containing BrdU cross-linked nucleotide, a double asterisk (\*\*) indicates the identified MS/MS cross-linked fragments that lost hydroxyl group or water molecule.

## SUPPLEMENTAL FIGURE LEGENDS

**FIGURE S1. Purification of A3G WT and tyrosine mutant proteins.** Proteins were produced in Baculovirus system and purified with Ni-NTI-agarose resin (Qiagen) as described in SI Materials and Methods. 2.5 µg of each protein was loaded onto 12% SDS-PAGE gel and stained with Coomassie SimpleBlue SafeStain (Thermo Scientific). BioRad Broad Range Markers were used as molecular mass standards.

**FIGURE S2. WT A3G and mutant Y181A, Y182A and Y315A showed similar profile of unfolding (dissociation curve) as determined by thermo fluorimetry.** WT and mutant A3G proteins were analyzed for dissociation (unfolding) in presence of SYPRO Orange fluorescence dye using Stratagene Mx3000P real-time qPCR system with 2 °C/min temperature increase, from 25 °C to 95 °C. Protein were expressed in Baculovirus system and purified with Ni-NTI resin (Qiagen), final protein concentration was 5 µM, reactions were ran in 1× PBS.

**FIGURE S3. A3G WT and tyrosine mutants showed similar protein expression level in bacterial reporter strain BW310 used in DNA mutator assay.** A3G WT and tyrosine mutants were subcloned into pTrc99A vector and transformed into *E. coli* BW310 reporter strain. Single colonies were inoculated into liquid LB and protein expression was induced by addition of 0.5 mM IPTG overnight. Cell extracts were prepared from 1 ml cultures, loaded onto 12% SDS-PAGE gel, western blotted and probed with anti-A3G antibody. Five independent colonies for each WT or mutant A3Gs were tested and a typical representative western blot is presented.

**FIGURE S4. A3G Y315A mutation affects protein packaging with HIV viral particles.** WT and mutant A3G constructs were co-transfected into HEK293T cells with plasmid encoding VSV-G coat protein in the absence of Vif and protein expression were evaluated by western blots with anti-A3G and control anti-GAPDH antibodies (top panel). Isolated viral particles were analyzed by western blotting for A3G content and the corresponding values for each mutant was normalized based on the level of p24 capsid protein in the particles (bottom panel). A3G:control protein ratio values are shown below each lane/sample. While ratios of WT A3G, Y181A and Y182A to control proteins were similar in cell extracts and in samples recovered with viral particles, Y315A mutation markedly reduced the recovery of A3G assembled with virions.
